# Supplementary material for: Aromatic nature of neutral and dianionic 1,4-diaza-2,3,5,6-tetraborinine derivatives
Source: Royal Society of Chemistry journal article supplement (doi:10.1039/d0ra09040a), 2021-01-01
Supplement: d0ra09040a1.pdf [file d0ra09040a1.pdf]

## Supplementary information

for

### **Aromatic Nature of Neutral and Dianionic 1,4-diaza-2,3,5,6-tetraborinine Derivatives**

Kei Ota, Rei Kinjo<sup>\*a</sup>

<sup>a</sup> Division of Chemistry and Biological Chemistry, School of Physical and Mathematical Sciences, Nanyang Technological University Nanyang Link 21, Singapore 637371 (Singapore)

This PDF file includes:

Methodology

Tables S1-S8

Fig. S1

## Methodology

### 1. HOMA

The HOMA scheme for  $N$ -membered cyclic hydrocarbon compound is defined as shown in eq 1:

$$\text{HOMA} = 1 - \frac{\alpha}{N} \sum_i (R_{\text{opt}} - R_i)^2 \quad (1)$$

In the equation,  $\alpha$  is an empirical constant chosen to give a value of HOMA = 0 for a nonaromatic system and HOMA = 1 for aromatic system with all bonds equal to an optimal bond length ( $R_{\text{opt}}$ ),  $N$  is the number of bonds taken into summation,  $R_i$  is an individual bond length and  $i$  represents the type of the bond. Krygowski and co-workers have proposed the extended HOMA scheme for heterocyclic compounds.

$$\text{HOMA} = 1 - \left[ 257.7(1.388 - r_{\text{av}})^2 + \frac{257.7}{N} \sum_i (r_{\text{av}} - r_i)^2 \right] \quad (2)$$

$$= 1 - \text{EN} - \text{GEO} \quad (3)$$

where  $r_{\text{av}}$  and  $r_i$  are an average of C-C bond lengths and individual C-C bond lengths, respectively. To apply this scheme to the heterocyclic compounds, the Pauling concept of bond number  $n$  was introduced:

$$R(1) - R(n) = c \ln(n) \quad (4)$$

$$n = \exp \frac{R(1) - R(n)}{c} \quad (5)$$

where  $R(n)$  and  $R(1)$  are the bond lengths whose bond numbers are  $n$  and 1, respectively. From reference value of  $R(1)$  and  $R(2)$ , we can estimate the constant  $c$  for X-Y bond by using Eq.(5).

The R(1), R(2), and  $c$  values for CC, BB, and BN bonds listed in Table 1, have been recommended and were used herein for HOMA calculations. Using the bond number  $n$ , the X-Y bond length can be converted into the virtual C-C bond length ( $r_i$ ) as

$$r_i = 1.467 - 0.1702 \ln(n) \quad (6)$$

Now we can evaluate HOMA value of various heterocyclic compounds by using Eq. (2).

**Table 1.** The R(1), R(2), and  $c$  values for CC, BB, and BN bonds.

|    | R(1)  | R(2)  | $c$    |
|----|-------|-------|--------|
| CC | 1.467 | 1.349 | 0.1702 |
| BB | 1.647 | 1.526 | 0.1751 |
| BN | 1.564 | 1.363 | 0.2900 |

## 2. ELF

The electron localization function (ELF), introduced by Becke and Edgencombe, can be used to analyse the electronic localization and characteristics of a chemical bond. The value of ELF at which two basins merge is called a bifurcation value. The ring-closure bifurcation value is the value of ELF at which all basins in the ring merge to form one continuous cyclic basin. A separation of the ELF values into its  $\sigma$  and  $\pi$  components (namely,  $ELF_\sigma$  and  $ELF_\pi$ ) was proposed as new aromaticity scales. Both  $ELF_\sigma$  and  $ELF_\pi$  are defined as the ELF values at the relative bifurcation points that is the (3, -1) critical points (CPs) of the ELF basin that only contribute from different molecular orbitals ( $\pi$ -orbitals or  $\sigma$ -orbitals). Aromatic molecules should hold at least the following two properties: (i) the maximal difference between the bifurcation values,  $ELF_\pi$  should be small, and (ii) the  $ELF_\pi$  should be above a certain threshold (0.64–0.70).<sup>1</sup> In this study, the aromaticity of the heterocyclic inorganic benzenes were also considered by averaged  $ELF_\sigma$  and  $ELF_\pi$ .<sup>2</sup>

### 3. PDI

The *para*-delocalization index (PDI), proposed by Sola and co-workers is derived from Bader's Atoms in Molecules (AIM) theory.<sup>3</sup> This index is defined as the average of three electron delocalization index (DIs) of *para*-related atoms in a given six-membered ring.<sup>4-6</sup> The higher PDI values, the more aromatic system is.

### 4. NICS

The computation of nucleus independent chemical shifts (NICSs): NICS(1)<sub>zz</sub>, NICS(0)<sub>πzz</sub>, and FiPC-NICS was used. Significantly negative (shielded) NICS values indicate a diatropic ring current and aromaticity, while positive (deshielded) values denote a paratropic ring current and antiaromaticity. The group of Pino-Rios and Tiznado remarked evaluating the s- and p-electron contributions to the out-of-plane components of NICS is the most adequate assessment for the quantitative analysis. The Tiznado and co-workers proposed a free of in-plane component NICS (FiPC-NICS) to assess aromaticity, identifying the point along the axis perpendicular to the molecular plane where the in-plane component of NICS becomes zero. It also allows visualizing the relation between the in-plane and out-of-plane components of NICS. The plots of these correlations provide curves whose shapes seem to be characteristics for aromatic, nonaromatic and antiaromatic systems. We also used the anisotropy of the current-induced density (ACID) to visualize ring current over the studied rings.

### 5. ASE

ASE has been evaluated using different isodesmic and homodesmotic (Scheme 1) reactions. The isodesmic reaction have been proposed for inorganic analogues. On the other hand, the

Tiznado and co-workers proposed the homodesmotic reaction to avoid  $sp^3$  hybridization of boron atom, which is expected to generate strain in the B–H bonds.<sup>7, 8</sup> Here, we can evaluate ASE value of model compounds.

**Table S1.** Optimized structure of **1**, **2**, **3**, **3'**, and **4'** obtained by DFT calculations (atom, x-, y-, z-positions in Å).

**1:**

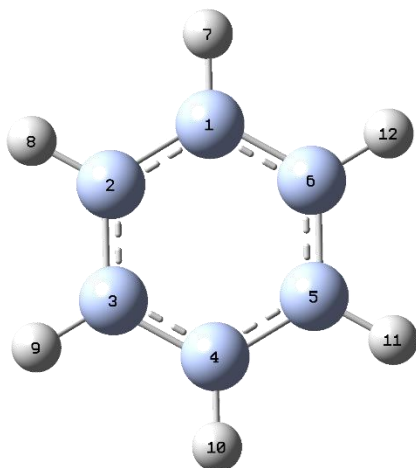

|   |           |           |           |
|---|-----------|-----------|-----------|
| C | -1.337282 | -0.394667 | 0.000002  |
| C | -0.326732 | -1.355449 | 0.000062  |
| C | 1.010416  | -0.960785 | -0.000056 |
| C | 1.337249  | 0.394786  | 0.000007  |
| C | 0.326849  | 1.355419  | 0.000057  |
| C | -1.010499 | 0.960699  | -0.000052 |

|   |           |           |           |
|---|-----------|-----------|-----------|
| H | -2.377180 | -0.701703 | -0.000061 |
| H | -0.581008 | -2.409500 | 0.000080  |
| H | 1.796302  | -1.707800 | -0.000122 |
| H | 2.377220  | 0.701555  | 0.000021  |
| H | 0.580872  | 2.409526  | -0.000001 |
| H | -1.796207 | 1.707909  | -0.000038 |

2:

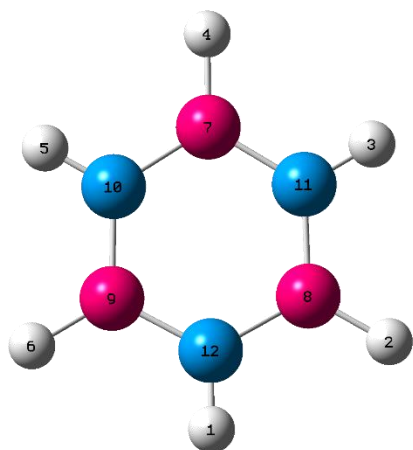

|   |           |           |           |
|---|-----------|-----------|-----------|
| B | 1.107098  | 0.939067  | -0.000001 |
| B | 0.259706  | -1.428296 | -0.000013 |
| B | -1.366800 | 0.489237  | 0.000011  |
| N | -0.252105 | 1.386574  | -0.000012 |
| N | 1.326878  | -0.474967 | 0.000009  |
| N | -1.074774 | -0.911613 | -0.000001 |

|   |           |           |           |
|---|-----------|-----------|-----------|
| H | -1.844157 | -1.564238 | -0.000002 |
| H | 0.472832  | -2.600706 | -0.000006 |
| H | 2.276761  | -0.814952 | 0.000017  |
| H | 2.015871  | 1.709846  | 0.000017  |
| H | -0.432620 | 2.379185  | -0.000016 |
| H | -2.488699 | 0.890870  | 0.000036  |

3:

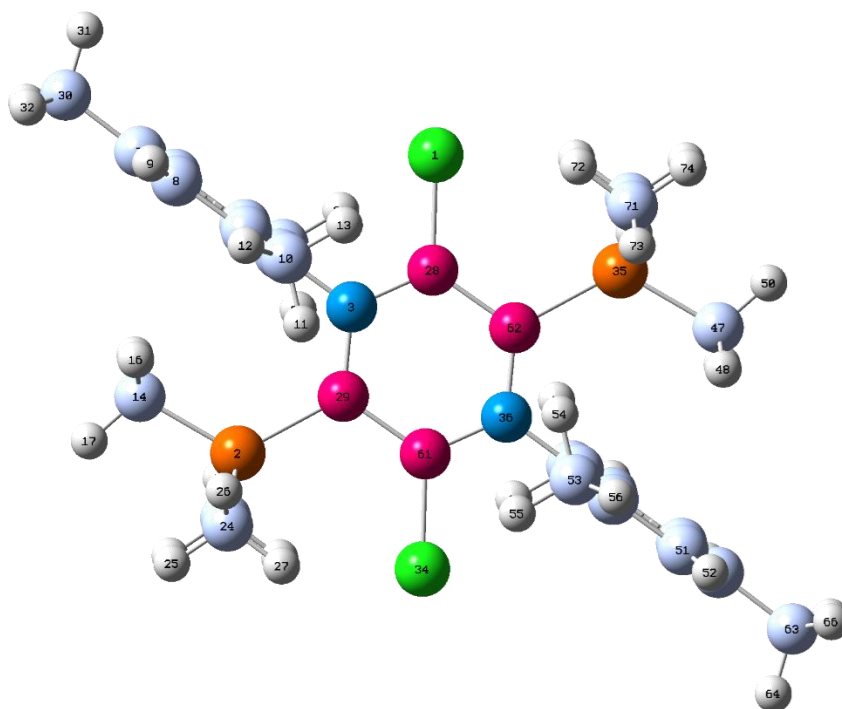

|    |           |           |           |
|----|-----------|-----------|-----------|
| Cl | 1.443887  | 3.034615  | -0.000316 |
| P  | 2.074707  | -2.734296 | 0.000166  |
| N  | 1.525743  | 0.220088  | 0.000007  |
| C  | 2.953580  | 0.448090  | -0.000027 |
| C  | 3.638188  | 0.571637  | -1.219821 |
| C  | 3.638169  | 0.572060  | 1.219728  |
| C  | 5.732364  | 0.886061  | -0.000087 |
| C  | 5.020150  | 0.780271  | -1.195624 |
| H  | 5.550417  | 0.870728  | -2.139647 |
| C  | 2.903183  | 0.523746  | -2.536999 |
| H  | 2.197125  | -0.309114 | -2.582505 |
| H  | 3.604289  | 0.437479  | -3.369896 |
| H  | 2.318105  | 1.437564  | -2.680231 |
| C  | 3.908169  | -2.642620 | 0.000389  |
| H  | 4.265469  | -2.111609 | 0.881626  |
| H  | 4.265653  | -2.112009 | -0.881021 |
| H  | 4.307449  | -3.660086 | 0.000652  |
| C  | 5.020140  | 0.780681  | 1.195472  |
| H  | 5.550400  | 0.871437  | 2.139471  |
| C  | 2.903176  | 0.524628  | 2.536930  |
| H  | 2.196737  | -0.307899 | 2.582534  |
| H  | 2.318535  | 1.438741  | 2.680091  |
| H  | 3.604265  | 0.438131  | 3.369818  |
| C  | 1.724883  | -3.809655 | -1.450930 |
| H  | 2.247077  | -4.765681 | -1.356419 |
| H  | 2.061385  | -3.301556 | -2.356273 |
| H  | 0.651368  | -3.980820 | -1.518282 |
| B  | 0.629450  | 1.352049  | -0.000034 |
| B  | 0.979599  | -1.131259 | 0.000067  |
| C  | 7.219589  | 1.150633  | -0.000134 |
| H  | 7.426659  | 2.226599  | -0.000696 |
| H  | 7.701455  | 0.726021  | -0.884352 |
| H  | 7.701337  | 0.726960  | 0.884596  |
| Cl | -1.443771 | -3.034662 | -0.000005 |
| P  | -2.074758 | 2.734156  | 0.000116  |
| N  | -1.525674 | -0.220099 | 0.000097  |
| C  | -2.953514 | -0.448089 | 0.000018  |

|   |           |           |           |
|---|-----------|-----------|-----------|
| C | -3.638197 | -0.571850 | 1.219737  |
| C | -3.638059 | -0.571683 | -1.219810 |
| C | -5.732329 | -0.885878 | -0.000180 |
| C | -5.020175 | -0.780408 | 1.195411  |
| H | -5.550500 | -0.871028 | 2.139386  |
| C | -2.903300 | -0.524195 | 2.536985  |
| H | -2.196713 | 0.308218  | 2.582382  |
| H | -3.604438 | -0.437315 | 3.369793  |
| H | -2.318847 | -1.438375 | 2.680472  |
| C | -3.908216 | 2.642231  | 0.000284  |
| H | -4.265620 | 2.111933  | -0.881348 |
| H | -4.265465 | 2.110847  | 0.881316  |
| H | -4.307606 | 3.659656  | 0.000939  |
| C | -5.020035 | -0.780233 | -1.195683 |
| H | -5.550249 | -0.870728 | -2.139733 |
| C | -2.902985 | -0.524017 | -2.536961 |
| H | -2.196528 | 0.308505  | -2.582381 |
| H | -2.318335 | -1.438104 | -2.680251 |
| H | -3.604023 | -0.437366 | -3.369876 |
| C | -1.724780 | 3.809562  | 1.451123  |
| H | -2.247057 | 4.765543  | 1.356634  |
| H | -2.061119 | 3.301476  | 2.356536  |
| H | -0.651272 | 3.980801  | 1.518344  |
| B | -0.629391 | -1.352063 | 0.000127  |
| B | -0.979510 | 1.131238  | 0.000079  |
| C | -7.219566 | -1.150377 | -0.000302 |
| H | -7.426689 | -2.226332 | -0.001189 |
| H | -7.701290 | -0.726944 | 0.884555  |
| H | -7.701414 | -0.725477 | -0.884394 |
| C | 1.724473  | -3.809670 | 1.451143  |
| H | 2.060694  | -3.301588 | 2.356599  |
| H | 0.650940  | -3.980847 | 1.518169  |
| H | 2.246703  | -4.765689 | 1.356763  |
| C | -1.725060 | 3.809602  | -1.450963 |
| H | -0.651575 | 3.980992  | -1.518244 |
| H | -2.061382 | 3.301429  | -2.356334 |
| H | -2.247458 | 4.765523  | -1.356501 |



3':

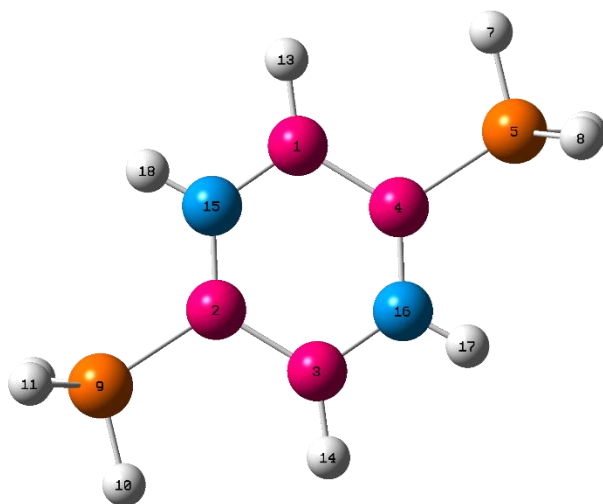

|   |           |           |           |
|---|-----------|-----------|-----------|
| B | -0.689367 | 1.398504  | -0.000123 |
| B | 1.446781  | 0.045569  | -0.000050 |
| B | 0.689367  | -1.398409 | -0.000154 |
| B | -1.446782 | -0.045466 | -0.000042 |
| P | -3.356866 | 0.025883  | 0.000128  |
| H | -4.135502 | -0.515849 | 1.065419  |
| H | -3.784547 | 1.362637  | 0.000207  |
| H | -4.135919 | -0.515770 | -1.064910 |
| P | 3.356865  | -0.025968 | 0.000032  |

|   |           |           |           |
|---|-----------|-----------|-----------|
| H | 3.784315  | -1.362794 | -0.000001 |
| H | 4.135799  | 0.515637  | -1.065110 |
| H | 4.135801  | 0.515571  | 1.065210  |
| H | -1.172566 | 2.499066  | 0.000112  |
| H | 1.172597  | -2.498958 | -0.000283 |
| N | 0.753049  | 1.301630  | -0.000028 |
| N | -0.753042 | -1.301537 | -0.000127 |
| H | -1.267176 | -2.175714 | -0.000174 |
| H | 1.267175  | 2.175811  | 0.000067  |

4':

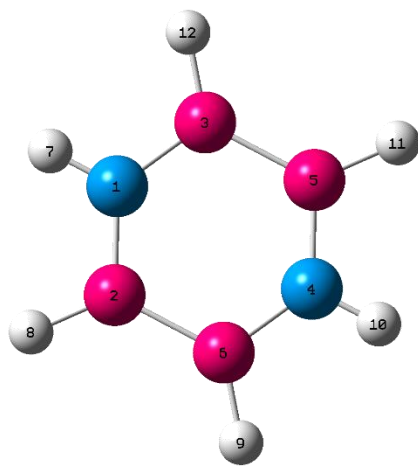

|   |           |           |           |
|---|-----------|-----------|-----------|
| N | 1.476540  | 0.000000  | 0.000002  |
| B | 0.828160  | -1.306783 | -0.010984 |
| B | 0.828162  | 1.306782  | 0.011048  |
| N | -1.476540 | 0.000002  | -0.000019 |
| B | -0.828153 | 1.306794  | 0.011677  |
| B | -0.828155 | -1.306793 | -0.011660 |

|   |           |           |           |
|---|-----------|-----------|-----------|
| H | 2.492346  | -0.000002 | -0.000031 |
| H | 1.592312  | -2.268909 | 0.032669  |
| H | -1.592339 | -2.268979 | 0.031682  |
| H | -2.492368 | 0.000001  | -0.000040 |
| H | -1.592334 | 2.268976  | -0.031805 |
| H | 1.592315  | 2.268900  | -0.032763 |

**Table S2.** Calculated NICS values (ppm) of 4' at different level.

| Distance (Å)            | NICS |      | NICS <sub>zz</sub> |        | NICS <sub>πzz</sub> |        |
|-------------------------|------|------|--------------------|--------|---------------------|--------|
|                         | 0    | 1    | 0                  | 1      | 0                   | 1      |
| <b>6-311g+(d,p)</b>     | 7.70 | 2.33 | -5.68              | -15.42 | -20.73              | -17.02 |
| <b>6-311g+(2df,2pd)</b> | 8.07 | 1.79 | -6.71              | -16.38 | -21.41              | -17.93 |
| <b>6-311g+(3df,3dp)</b> | 7.79 | 1.34 | -4.94              | -14.75 | -19.96              | -16.00 |

**Table S3.** Calculated HOMA values of studied molecules.

|           | Type | Bond length | bond number |
|-----------|------|-------------|-------------|
| <b>1</b>  | C-C  | 1.39439     | 1.532       |
|           | C-C  | 1.39418     | 1.534       |
|           | C-C  | 1.39441     | 1.532       |
|           | C-C  | 1.39417     | 1.534       |
|           | C-C  | 1.39438     | 1.532       |
|           | C-C  | 1.39420     | 1.534       |
| <b>2</b>  | B-N  | 1.43101     | 1.582       |
|           | B-N  | 1.43098     | 1.582       |
|           | B-N  | 1.43101     | 1.582       |
|           | B-N  | 1.43096     | 1.582       |
|           | B-N  | 1.43100     | 1.582       |
|           | B-N  | 1.43098     | 1.582       |
| <b>3</b>  | B-B  | 1.62407     | 1.143       |
|           | B-B  | 1.62404     | 1.143       |
|           | B-N  | 1.45754     | 1.444       |
|           | B-N  | 1.44384     | 1.513       |
|           | B-N  | 1.45753     | 1.444       |
|           | B-N  | 1.44384     | 1.513       |
| <b>3'</b> | B-B  | 1.63056     | 1.101       |
|           | B-B  | 1.63057     | 1.101       |
|           | B-N  | 1.43492     | 1.561       |
|           | B-N  | 1.44566     | 1.504       |
|           | B-N  | 1.43491     | 1.561       |
|           | B-N  | 1.44567     | 1.504       |
| <b>4'</b> | B-B  | 1.65632     | 0.950       |
|           | B-B  | 1.65632     | 0.950       |
|           | B-N  | 1.45885     | 1.437       |
|           | B-N  | 1.45885     | 1.437       |
|           | B-N  | 1.45883     | 1.437       |
|           | B-N  | 1.45883     | 1.437       |

**Table S4.** Properties of electron density at ring critical point of **1-4'**.

|           | $\rho(r_c)$ | $\nabla^2\rho(r_c)$ | $G(r_c)$ | $H(r_c)$ | $\lambda_1$ | $\lambda_2$ | $\lambda_3$ | $\varepsilon$ |
|-----------|-------------|---------------------|----------|----------|-------------|-------------|-------------|---------------|
| <b>1</b>  | 0.0215      | 0.1614              | 0.0326   | 0.0078   | -0.0168     | 0.0891      | 0.0891      | -1.1886       |
| <b>2</b>  | 0.0197      | 0.1195              | 0.0251   | 0.0047   | -0.0140     | 0.0668      | 0.0668      | -1.2100       |
| <b>3</b>  | 0.0171      | 0.0785              | 0.0171   | 0.0025   | -0.0108     | 0.0346      | 0.0546      | -1.3104       |
| <b>3'</b> | 0.0172      | 0.0850              | 0.0184   | 0.0029   | -0.0113     | 0.0417      | 0.0546      | -1.2708       |
| <b>4'</b> | 0.0156      | 0.0821              | 0.0174   | 0.0031   | -0.0096     | 0.0453      | 0.0464      | -1.2110       |

**Table S5.** Raw energy data for RSE calculation of (a).

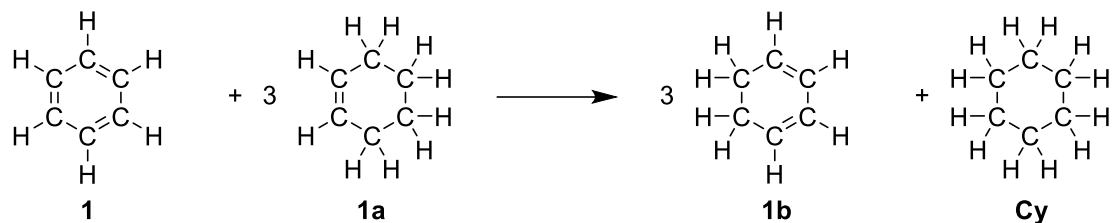

| (a)                           | Zero-point correction | Thermal correction to Energy | Thermal correction to Enthalpy | Thermal correction to Gibbs Free Energy | Sum of electronic and zero-point Energies | Sum of electronic and thermal Energies | Sum of electronic and thermal Enthalpies | Sum of electronic and thermal Free Energies |
|-------------------------------|-----------------------|------------------------------|--------------------------------|-----------------------------------------|-------------------------------------------|----------------------------------------|------------------------------------------|---------------------------------------------|
| <b>1</b>                      | 0.100153              | 0.104553                     | 0.105497                       | 0.072688                                | -232.211089                               | -232.206689                            | -232.205745                              | -232.238554                                 |
| <b>1a</b>                     | 0.14558               | 0.151103                     | 0.152048                       | 0.116929                                | -234.567577                               | -234.562053                            | -234.561109                              | -234.596227                                 |
| <b>1b</b>                     | 0.121786              | 0.126971                     | 0.127916                       | 0.093549                                | -233.362089                               | -233.356904                            | -233.35596                               | -233.390326                                 |
| <b>Cy</b>                     | 0.169491              | 0.175223                     | 0.176168                       | 0.141737                                | -235.775335                               | -235.769602                            | -235.768658                              | -235.803089                                 |
| RSE [au]                      |                       |                              |                                |                                         |                                           |                                        |                                          | 0.053168                                    |
| RSE [kcal mol <sup>-1</sup> ] |                       |                              |                                |                                         |                                           |                                        |                                          | 33.36292                                    |

**Table S6.** Raw energy data for RSE calculation of (b).

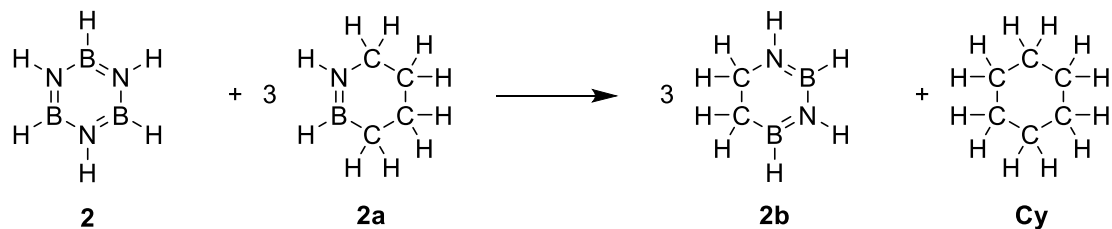

| (b)                           | Zero-point correction | Thermal correction to Energy | Thermal correction to Enthalpy | Thermal correction to Gibbs Free Energy | Sum of electronic and zero-point Energies | Sum of electronic and thermal Energies | Sum of electronic and thermal Enthalpies | Sum of electronic and thermal Free Energies |
|-------------------------------|-----------------------|------------------------------|--------------------------------|-----------------------------------------|-------------------------------------------|----------------------------------------|------------------------------------------|---------------------------------------------|
| <b>2</b>                      | 0.093176              | 0.098388                     | 0.099333                       | 0.065051                                | -242.655345                               | -242.650133                            | -242.649189                              | -242.68347                                  |
| <b>2a</b>                     | 0.14289               | 0.148729                     | 0.149673                       | 0.113981                                | -238.02607                                | -238.020231                            | -238.019287                              | -238.054979                                 |
| <b>2b</b>                     | 0.11703               | 0.122837                     | 0.123781                       | 0.088211                                | -240.314275                               | -240.308469                            | -240.307524                              | -240.343095                                 |
| <b>Cy</b>                     | 0.169491              | 0.175223                     | 0.176168                       | 0.141737                                | -235.775335                               | -235.769602                            | -235.768658                              | -235.803089                                 |
| RSE [au]                      |                       |                              |                                |                                         |                                           |                                        |                                          | 0.016033                                    |
| RSE [kcal mol <sup>-1</sup> ] |                       |                              |                                |                                         |                                           |                                        |                                          | 10.0607075                                  |

**Table S7.** Raw energy data for RSE calculation of (c).

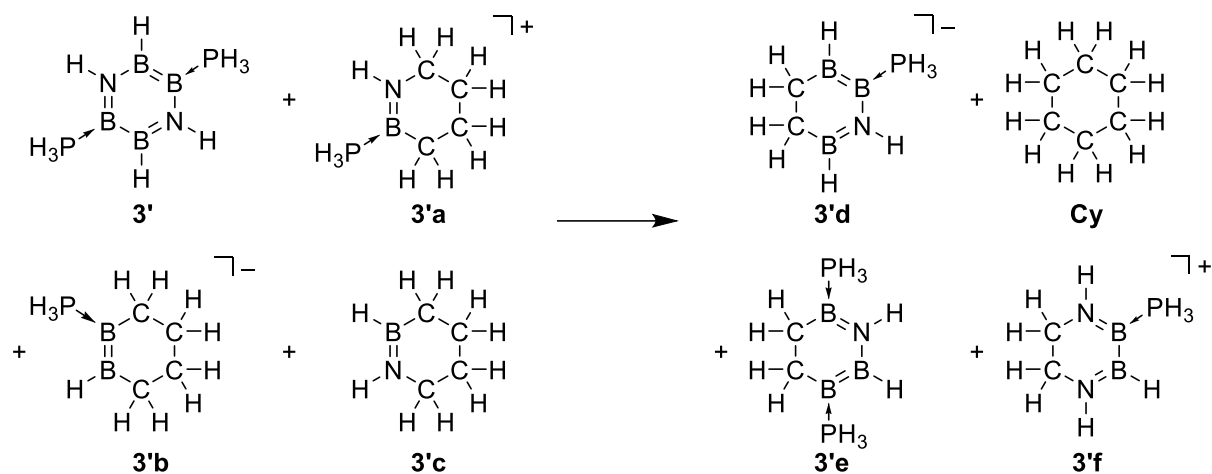

| (c)                           | Zero-point correction | Thermal correction to Energy | Thermal correction to Enthalpy | Thermal correction to Gibbs Free Energy | Sum of electronic and zero-point Energies | Sum of electronic and thermal Energies | Sum of electronic and thermal Enthalpies | Sum of electronic and thermal Free Energies |
|-------------------------------|-----------------------|------------------------------|--------------------------------|-----------------------------------------|-------------------------------------------|----------------------------------------|------------------------------------------|---------------------------------------------|
| <b>3'</b>                     | 0.123163              | 0.133732                     | 0.134676                       | 0.087362                                | -897.661346                               | -897.650776                            | -897.649832                              | -897.697147                                 |
| <b>3'a</b>                    | 0.162639              | 0.171086                     | 0.17203                        | 0.129642                                | -580.344718                               | -580.336271                            | -580.335326                              | -580.377715                                 |
| <b>3'b</b>                    | 0.14289               | 0.148729                     | 0.149673                       | 0.113981                                | -238.02607                                | -238.020231                            | -238.019287                              | -238.054979                                 |
| <b>3'c</b>                    | 0.151726              | 0.160224                     | 0.161169                       | 0.119034                                | -550.613642                               | -550.605144                            | -550.6042                                | -550.646334                                 |
| <b>3'd</b>                    | 0.125097              | 0.133662                     | 0.134606                       | 0.092361                                | -552.891209                               | -552.882645                            | -552.881701                              | -552.923945                                 |
| <b>3'e</b>                    | 0.146388              | 0.157479                     | 0.158423                       | 0.109679                                | -895.368798                               | -895.357707                            | -895.356763                              | -895.405507                                 |
| <b>3'f</b>                    | 0.137604              | 0.145877                     | 0.146821                       | 0.104905                                | -582.572987                               | -582.564714                            | -582.56377                               | -582.605686                                 |
| <b>Cy</b>                     | 0.169491              | 0.175223                     | 0.176168                       | 0.141737                                | -235.775335                               | -235.769602                            | -235.768658                              | -235.803089                                 |
| RSE [au]                      |                       |                              |                                |                                         |                                           |                                        |                                          | 0.037948                                    |
| RSE [kcal mol <sup>-1</sup> ] |                       |                              |                                |                                         |                                           |                                        |                                          | 23.81237                                    |

**Table S8.** Raw energy data for RSE calculation of (d).

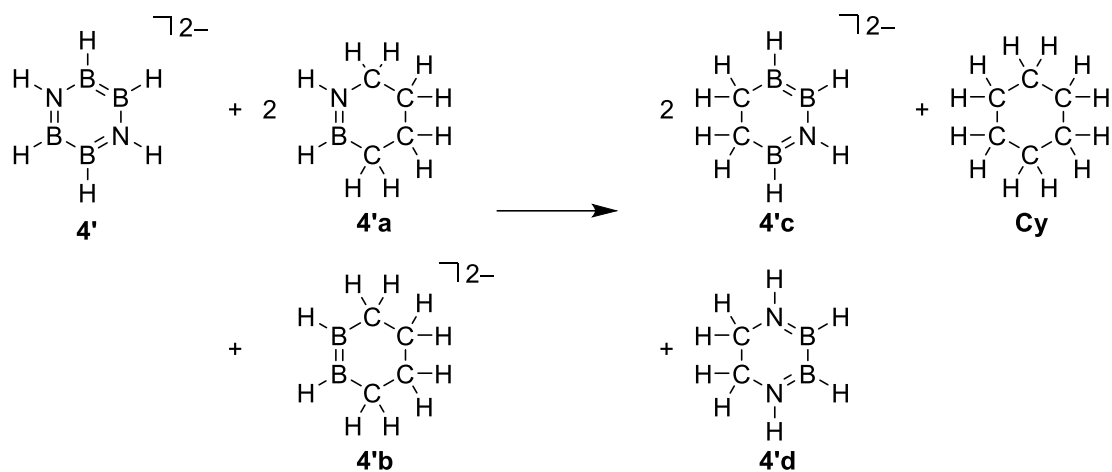

| (d)                           | Zero-point correction | Thermal correction to Energy | Thermal correction to Enthalpy | Thermal correction to Gibbs Free Energy | Sum of electronic and zero-point Energies | Sum of electronic and thermal Energies | Sum of electronic and thermal Enthalpies | Sum of electronic and thermal Free Energies |
|-------------------------------|-----------------------|------------------------------|--------------------------------|-----------------------------------------|-------------------------------------------|----------------------------------------|------------------------------------------|---------------------------------------------|
| <b>4'</b>                     | 0.081778              | 0.087475                     | 0.08842                        | 0.053433                                | -212.502999                               | -212.497301                            | -212.496357                              | -212.531343                                 |
| <b>4'a</b>                    | 0.14289               | 0.148729                     | 0.149673                       | 0.113981                                | -238.02607                                | -238.020231                            | -238.019287                              | -238.054979                                 |
| <b>4'b</b>                    | 0.130619              | 0.137045                     | 0.137989                       | 0.101362                                | -207.915235                               | -207.908809                            | -207.907865                              | -207.944492                                 |
| <b>4'c</b>                    | 0.106233              | 0.112401                     | 0.113345                       | 0.077334                                | -210.215626                               | -210.209458                            | -210.208514                              | -210.244525                                 |
| <b>4'd</b>                    | 0.117573              | 0.123267                     | 0.124211                       | 0.088945                                | -240.247536                               | -240.241842                            | -240.240897                              | -240.276163                                 |
| <b>Cy</b>                     | 0.169491              | 0.175223                     | 0.176168                       | 0.141737                                | -235.775335                               | -235.769602                            | -235.768658                              | -235.803089                                 |
| RSE [au]                      |                       |                              |                                |                                         |                                           |                                        |                                          | 0.017491                                    |
| RSE [kcal mol <sup>-1</sup> ] |                       |                              |                                |                                         |                                           |                                        |                                          | 10.9756025                                  |

(1)

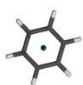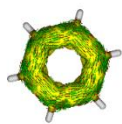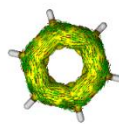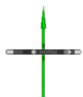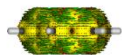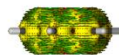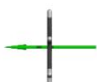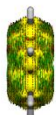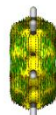

(2)

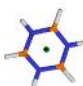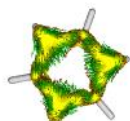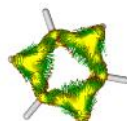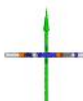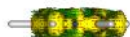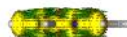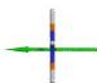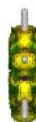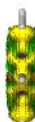



(3')

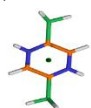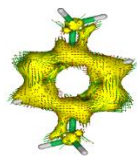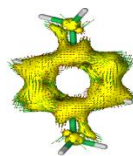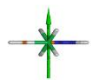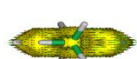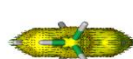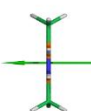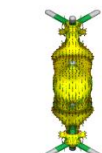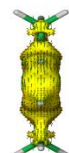

(4')

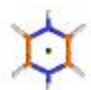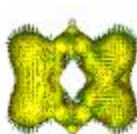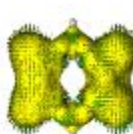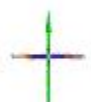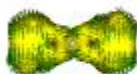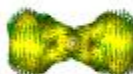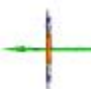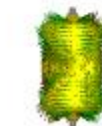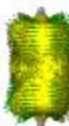

Figure S1. ACID plot of selected  $\pi$  orbitals at an isosurface value of 0.03.

## References

- 1 M. Solà, *Aromaticity*, John Wiley & Sons, Ltd, 2017.
- 2 B. Hou, P. Yi, Z. Wang, S. Zhang, J. Zhao, R. L. Mancera, Y. Cheng and Z. Zuo, *Comput. Theor. Chem.*, 2014, **1046**, 20-24.
- 3 R. F. W. Bader, *Chem. Rev.*, 1991, **91**, 893-928.
- 4 R. F. W. Bader and M. E. Stephens, *J. Am. Chem. Soc.*, 1975, **97**, 7391-7399.
- 5 X. Fradera, M. A. Austen and R. F. W. Bader, *J. Phys. Chem. A*, 1999, **103**, 304-314.
- 6 X. Fradera, J. Poater, S. Simon, M. Duran and M. Solà, *Theor. Chem. Acc.*, 2002, **108**, 214-224.
- 7 E. Osorio, J. K. Olson, W. Tiznado and A. I. Boldyrev, *Chem. Eur. J.*, 2012, **18**, 9677-9681.
- 8 J. J. Torres-Vega, A. Vasquez-Espinal, J. Caballero, M. L. Valenzuela, L. Alvarez-Thon, E. Osorio and W. Tiznado, *Inorg. Chem.*, 2014, **53**, 3579-3585.
